# Supplementary material
Source: MDPI journal article supplement (https://www.mdpi.com/1999-4907/7/8/170)
Supplement: s1 [file s1]

## Sheet: REFERENCES
ID	REFERENCES	YEAR OF PUBLICATION	TYPE OF PUBLICATION	REVIEW PROCESS	Type Of Essay	REGION OF INTEREST	COUNTRY	Type Of Intervention	Focus Social outcomes	Focus Biophysical outcomes	Owned by communities	Designated for use	Subsistence	Enterprise	Reducing deforestation	Reducing degradation	C Stock enhancement	Sustainable Management	Forest conservation	Biophysical Comparator	Biophysical Comparator Value	income	employment	security	empowerment	equity	Social Comparator	Social Comparator Value
1	ADHIKARI, B., DI FALCO, S. & LOVETT, J. C. 2004. Household characteristics and forest dependency: evidence from common property forest management in Nepal. Ecological Economics, 48, 245-257.	2004	Journal article	PEER-REVIEWED	CS	ASIA	NEPAL	CF	1	0	0	1	1	0								1	0	1		-1	NONE	2
2	AGRAWAL, A. 2001. Common property institutions and sustainable governance of resources. World Development, 29, 1649-1672.	2001	Journal article	PEER-REVIEWED	TP	GLOBAL
3	AGRAWAL, A. & ANGELSEN, A. 2009. Using community forest management to achieve REDD+ goals. In: ANGELSEN, A., WITH, BROCKHAUS, M., KANNINEN, M., SILLS, E. O., SUNDERLIN, W. D. & WERTZ-KANOUNNIKOFF, S. (eds.) Realising REDD+: National strategy and policy options. Bogor, Indonesia: CIFOR.	2009	Book Chapter	NA	TP	GLOBAL			1	1
4	AGRAWAL, A. & CHHATRE, A. 2006. Explaining Success on the Commons: Community Forest Governance in the Indian Himalaya. World Development, 34, 149-166.	2006	Journal article	PEER-REVIEWED	CS	ASIA	INDIA	community-based conservation	0	1	0	1	1	0						SM
5	AGRAWAL, A., CHHATRE, A. & HARDIN, R. 2008. Changing governance of the world's forests. Science, 320, 1460-1462.	2008	Journal article	PEER-REVIEWED	TP	GLOBAL
6	AGRAWAL, A. & GIBSON, C. C. 1999. Enchantment and disenchantment: The role of community in natural resource conservation. World Development, 27, 629-649.	1999	Journal article	PEER-REVIEWED	TP	GLOBAL
7	ALI, T., AHMAD, M., SHABAZ, B. & SULERI, A. 2007. Impact of participatory forest management on vulnerability and livelihood assets of forest-dependent communities in northern Pakistan. International Journal of Sustainable Development & World Ecology, 14, 211-223.	2007	Journal article	PEER-REVIEWED	CS	ASIA	PAKISTAN	Participatory Forest Management	1	0	0	1	1	0	-1	-1	0	0	0	NCFM	3	0	0	1	1		NCFM	2
8	ALIX-GARCIA, J., DE JANVRY, A. & SADOULET, E. 2005. A tale of two communities: explaining deforestation in Mexico. World Development, 33, 219-235.	2005	Journal article	PEER-REVIEWED	CS	LAC	MEXICO	community forest management/Ejidos	0	1	1	0	1	1						CFM/CFM	1
9	AMEHA, A., NIELSEN, O. J. & LARSEN, H. O. 2014. Impacts of access and beneﬁt sharing on livelihoods and forest: Case of participatory forest management in Ethiopia. Ecological Economics, 97, 162–171.	2014	Journal article	PEER-REVIEWED	CS	AFRICA	ETHIOPIA	Participatory Forest Management	1	0	0	1	1	1								1/-1	0	-1	0	-1	REC NCFM	1
10	ANDERSON, E. K. & ZERRIFFI, H. 2012. Seeing the trees for the carbon: agroforestry for development and carbon mitigation. Climatic Change, 115, 741-757.	2012	Journal article	PEER-REVIEWED	R	GLOBAL		Community Agroforestry/CDM
11	ANDERSSON, K. & AGRAWAL, A. 2011. Inequalities, institutions, and forest commons. Global Environmental Change, 21, 866-875.	2011	Journal article	PEER-REVIEWED	CS	GLOBAL	MULTIPLE	Forest user groups	1	1	1	0			-1					NONE	3					-1	NONE	1
12	ARMENTERAS, D., RODRÍGUEZ, N. & RETANA, J. 2009. Are conservation strategies effective in avoiding the deforestation of the Colombian Guyana Shield? Biological Conservation and Society, 142, 1411-1419.	2009	Journal article	PEER-REVIEWED	CS	LAC	COLOMBIA	IR	0	1	1	0			1					NM, PA	1
13	ASQUITH, N. M., VARGAS RIOS, M. T. & SMITH, J. 2002. Can forest-protection carbon projects improve rural livelihoods? Analysis of the Noel Kempff Mercado Climate Action Project, Bolivia. Mitigation and Adaptation Strategies for Global Change, 7, 323-337.	2002	Journal article	PEER-REVIEWED	CS	LAC	BOLIVIA	CDM	1	0	0	1										-1	1	1	0	-1	NONE	2
14	ARNOLD, J. E. M. 2001. Forests and People: 25 years of Community Forestry. Rome: Food and Agriculture Organization of the United Nations.	2001	Report/Working Paper	PEER-REVIEWED	R	GLOBAL
15	BALAND, J.-M., BARDHAN, P., DAS, S. & MOOKHERJEE, D. 2010. Forests to the People: Decentralization and Forest Degradation in the Indian Himalayas World Development, 38, 1642-1656.	2010	Journal article	PEER-REVIEWED	CS	ASIA	INDIA	CFM	0	1	0	1	1	0		1	1			SM, NM	1
16	BALDERAS TORRES, A. & SKUTSCH, M. 2012. Splitting the Difference: A Proposal for Benefit Sharing in Reduced Emissions from Deforestation and Forest Degradation (REDD+). Forests, 3, 137-154.	2012	Journal article	PEER-REVIEWED	TP
17	BALOONI, K. & LUND, J. F. 2013. Forest rights: the hard currency of REDD+. Conservation letters.	2013	Journal article	PEER-REVIEWED	R	GLOBAL		CFM
18	BARSIMANTOV, J., RACELIS, A., BIEDENWEG, K. & DIGIANO, M. 2011. When collective action and tenure allocations collide: Outcomes from community forests in Quintana Roo, Mexico and Petén, Guatemala. Land Use Policy, 28, 343-352.	2011	Journal article	PEER-REVIEWED	TP	LAC	MEXICO GUATEMALA	CF
19	BARSIMANTOV, J. & KENDALL, J. 2012. Community Forestry, Common Property, and Deforestation in Eight Mexican states. The Journal of Environment Development, 21, 414-437.	2012	Journal article	PEER-REVIEWED	CS	LAC	MEXICO	CF	0	1	1	0	0	1	1	0	1	1	1	% in Municipality	2
20	BENESSAIAH, K. 2012. Carbon and livelihoods in Post-Kyoto: Assessing voluntary carbon markets. Ecological Economics, 77, 1-6.	2012	Journal article	PEER-REVIEWED	R	GLOBAL		CDM
21	BEYMER-FARRIS, B. A. & BASSETT, T. J. 2012. The REDD menace: Resurgent protectionism in Tanzania's mangrove forests. Global Environmental Change-Human and Policy Dimensions, 22, 332-341.	2012	Journal article	PEER-REVIEWED	CS	AFRICA	TANZANIA	REDD	1	0	0	1										0	0	-1	-1		NONE	2
22	BLAIKIE, P. 2006. Is Small Really Beautiful? Community-based Natural Resource Management in Malawi and Botswana. World Development, 34, 1942-1957.	2006	Journal article	PEER-REVIEWED	CS	AFRICA	MALAWI BOTSWANA	CBNRM	1	0	1	0										0	0	-1	-1	-1	NONE	3
23	BLOMLEY, T., PFLIEGNER, K., ISANGO, J., ZAHABU, E., AHRENDS, A. & BURGESS, N. D. 2008. Seeing the wood for the trees: an assessment of the impact of participatory forest management on forest condition in Tanzania. Oryx, 42, 380-391.	2008	Journal article	PEER-REVIEWED	CS	AFRICA	TANZANIA	PFM	0	1	0	1			0	1	1	1	1	SM, NCFM	1
24	BLUFFSTONE, R. 2013. Economics of REDD+ and Community Forestry. Journal of Forest and Livelihood, 11, 69-74.	2013	Journal article	PEER-REVIEWED	TP	GLOBAL		REDD
25	BLUFFSTONE, R., ROBINSON, E. & GUTHIGA, P. 2013. REDD+and community-controlled forests in low-income countries: Any hope for a linkage? Ecological Economics, 87, 43-52.	2013	Journal article	PEER-REVIEWED	TP	GLOBAL		REDD
26	BOWLER, D. E., BUYUNG-ALI, L. M., HEALEY, J. R., JONES, J. P. G., KNIGHT, T. M. & PULLIN, A. S. 2012. Does community forest management provide global environmental benefits and improve local welfare? Frontiers in Ecology and the Environment, 10, 29-36.	2012	Journal article	PEER-REVIEWED	TP	GLOBAL			1	1
27	BOTTAZZI, P., CRESPO, D., SORIA, H., DAO, H., SERRUDO, M., BENAVIDES, J. P., SCHWARZER, S. & RIST, S. 2014. Carbon Sequestration in Community Forests: Trade-offs, Multiple Outcomes and Institutional Diversity in the Bolivian Amazon. Development and Change, 45, 105-131.	2014	Journal article	PEER-REVIEWED	CS	LAC	BOLIVIA	REDD*	1	1			1	1				1	1	NONE	1		1	1		1	SCENARIO	1
28	BOWLER, D. E., BUYUNG-ALI, L. M., HEALEY, J. R., JONES, J. P. G., KNIGHT, T. M. & PULLIN, A. S. 2012. Does community forest management provide global environmental benefits and improve local welfare? Frontiers in Ecology and the Environment, 10, 29-36.	2012	Journal article	PEER-REVIEWED	R	GLOBAL			1	1
29	BOYD, E. 2009. Governing the Clean Development Mechanism: global rhetoric versus local realities in carbon sequestration projects. Environment and Planning A, 41, 2380-2395.	2009	Journal article	PEER-REVIEWED	TP	LAC	MULTIPLE	CDM
30	BOYD, E., GUTIERREZ, M. & CHANG, M. 2007. Small-scale forest carbon projects: adapting CDM to low-income communities. Global Environmental Change, 17, 250-259.	2007	Journal article	PEER-REVIEWED	TP	GLOBAL
31	BRAY, D. B., ANTINORI, C. & TORRES-ROJO, J. M. 2006. The Mexican model of community forest management: The role of agrarian policy, forest policy and entrepreneurial organization. Forest Policy and Economics, 8, 470-484.	2006	Journal article	PEER-REVIEWED	TP	LAC	MEXICO	CFM
32	BRAY, D. B., DURAN, E., RAMOS, V. H., MAS, J. F., VELAZQUES, A., MCNAB, R. B., BARRY, D. & RADACHOWSKY, J. 2008. Tropical Deforestation, Community Forests, and Protected Areas in the Maya Forest. Ecology and Society, 13.	2008	Journal article	PEER-REVIEWED	CS	LAC	MEXICO GUATEMALA	CFM	0	1	1	0	0	1	0	0	0	1	1	PA	1
33	BRAY, D. B., ELLIS, E. A., ARMIJO-CANTO, N. & BECK, C. T. 2004. The institutional drivers of sustainable landscapes: a case study of the “Mayan Zone” in Quintana Roo, Mexico. Land Use Policy, 21, 333-346.	2004	Journal article	PEER-REVIEWED	CS	LAC	MEXICO	CFM	0	1	1	0	0	1	0	0	0	1	1	BA	1
34	BROWN, K. & CORBERA, E. 2003. Exploring equity and sustainable development in the new carbon economy. Climate policy, 3, Supplement 1, S41-S56.	2003	Journal article	PEER-REVIEWED	TP	LAC	MEXICO	CDM
35	BYRON, N. & ARNOLD, M. 1999. What futures for the people of the tropical forests? World Development, 27, 789-805.	1999	Journal article	PEER-REVIEWED	TP
36	CAPLOW, S., JAGGER, P., LAWLOR, K. & SILLS, E. 2011. Evaluating land use and livelihood impacts of early forest carbon projects: Lessons for learning about REDD+. Environmental Science & Policy, 14, 152-167.	2011	Journal article	PEER-REVIEWED	R	GLOBAL		REDD
37	CHARNLEY, S. & POE, M. 2007. Community Forestry in Theory and Practice: Where are we now? Annual Review of Anthropology, 36, 301-336.	2007	Journal article	PEER-REVIEWED	R	GLOBAL		CF	1	1	1	1	0	1	0	0	0	1	1	NONE		1	1			1	NONE
38	CHHATRE, A. & AGRAWAL, A. 2009. Trade-offs and synergies between carbon storage and livelihood benefits from forest commons. Proceedings of the National Academy of Sciences of the United States of America, 106, 17667-17670.	2009	Journal article	PEER-REVIEWED	CS	GLOBAL	MULTIPLE	CP	1	1	1	1	1	0	0	1	1	1	1	BCT	1	0	0	1	1	1	BCT	1
39	CHHATRE, A. & AGRAWAL, A. 2008. Forest commons and local enforcement. Proceedings of the National Academy of Sciences, 105, 13286-13291.	2008	Journal article	PEER-REVIEWED	CS	GLOBAL	MULTIPLE	CP	0	1	1	1	1	1	0	1	1	0	0	NONE	BG
40	COLEMAN, E. A. & FLEISCHMAN, F. D. 2012. Comparing Forest Decentralization and Local Institutional Change in Bolivia, Kenya, Mexico, and Uganda. World Development, 40, 836-849.	2012	Journal article	PEER-REVIEWED	CS	LAC AFRICA	MULTIPLE	CP	1	1	1	1	1		0	0	0	0	0	BA	3	0	0	1	1	0	BA	2
41	CHOMITZ, K. M., BUYS, P., DE LUCA, G., THOMAS, T. & WERTZ-KANOUNNIKOFF 2007. At Loggerheads?: Agricultural Expansion, Poverty Reduction, and Environment in the Tropical Forests, Washington, D.C., The International Bank for Reconstruction and Development/ The World Bank.	2007	Book	NA	TP	GLOBAL
42	COOMES, O. T., GRIMARD, F., POTVIN, C. & SIMA, P. 2008. The Fate of Tropical Forest: Carbon or Cattle? Ecological Economics, 65, 207-212.	2008	Journal article	PEER-REVIEWED	CS	LAC	PANAMA	CDM	1	0	1	0	1	1								1/-1	1/-1	1/-1		1/-1	SCENARIOS
43	CORBERA, E. & BROWN, K. 2008. Building Institutions to Trade Ecosystem Services: Marketing Forest Carbon in Mexico. World Development, 36, 1956-1979.	2008	Journal article	PEER-REVIEWED	TP	LAC	MEXICO	CDM
44	COSTENBADER, J. 2011. REDD+ Benefit Sharing: A Comparative Assessment of Three National Policy Approaches. Forest Carbon Partnership Facility & UN-REDD programme.	2011	Report/Working Paper	NA	TP	GLOBAL		REDD
45	COTULA, L. & MAYERS, J. 2009. Tenure in REDD: Start-Point or Afterthought? IIED Report. London, UK: IIED.	2009	Report/Working Paper	NA	TP	GLOBAL		REDD
46	DALLE, S. P., PULIDO, M. T. & DE BLOIS, S. 2011. Balancing shifting cultivation and forest conservation: lessons from a "sustainable landscape" in southeastern Mexico. Ecological Applications, 21, 1557-1572.	2011	Journal article	PEER-REVIEWED	CS	LAC	MEXICO	CFM	0	1	1	0	1	1	-1	-1	0	1	1	BA	1
47	DOHERTY, E. & SCHROEDER, H. 2011. Forest Tenure and Multi-level Governance in Avoiding Deforestation under REDD+. Global Environmental Politics, 11, 66-88.	2011	Journal article	PEER-REVIEWED	TP	GLOBAL
48	EDMUNDS, D. & WOLLENBERG, E. (eds.) 2003. Local forest management: the impacts of devolution policies, London, UK: Earthscan.	2003	Book	NA	TP	GLOBAL
49	ELLIS, E. A. & PORTER-BOLLAND, L. 2008. Is community-based forest management more effective than protected areas? A comparison of land use/land cover change in two neighboring study areas of the Central Yucatan Peninsula, Mexico. Forest Ecology and Management, 256, 1971-1983.	2008	Journal article	PEER-REVIEWED	CS	LAC	MEXICO	CFM	0	1	1	0	1	1	1		1	1	1	PA/BA	1
50	GAUTAM, A. P., SHIVAKOTI, G. P. & WEBB, E. L. 2004. Forest Cover Change, Physiography, Local Economy, and Institutions in a Mountain Watershed in Nepal. Environmental Management 33, 48-61.	2004	Journal article	PEER-REVIEWED	CS	ASIA	NEPAL	CFM Semigovernment	0	1	0	1	1	1	0	1	1	1	1	SM	1
51	GLASMEIER, A. K. & FARRIGAN, T. 2005. Understanding community forestry: a qualitative metastudy of the concept, the process, and its potential for poverty alleviation in the United States case. The Geographical Journal, 171, 56-69.	2005	Journal article	PEER-REVIEWED	TP
52	HAJJAR, R. 2011. Community Forests for Forest Communities: an Examination of Power Imbalances, Challenges and Goals in Brazil and Mexico. PhD thesis, University of British Columbia.	2011	PhD Thesis	PEER-REVIEWED	CS	LAC	BRAZIL MEXICO	CF	1	0	1	1	0	1								1	1	1	0	1	NONE	QR
53	HAJJAR, R., KOZAK, R. & INNES, J. 2012. Is decentralization leading to “real” decision-making power for forest-dependent communities? Case studies from Mexico and Brazil. Ecology and Society, 17, 12.	2012	Journal article	PEER-REVIEWED	CS	LAC	BRAZIL MEXICO	CF	1	0	1	1	0	1								1	1	1	0	1	NONE	QR
54	HAJJAR, R., MCGRATH, D., KOZAK, R. & INNES, J. 2011. Framing community forestry challenges with a broader lens: Case studies from the Brazilian Amazon. Journal of Environmental Management, 92, 2159-2169.	2011	Journal article	PEER-REVIEWED	CS	LAC	BRAZIL	CF	1	0	0	1	1	1										0			NONE	QR
55	HAUPT, F. & VON LÜPKE, H. 2007. Obstacles and Opportunities for Afforestation and Reforestation Projects under the Clean Development Mechanism of the Kyoto Protocol. Shangha, China: FAO, Advisory Committee on Paper and Wood Products.	2007	Report/Working Paper	NA	TP			CDM
56	HAYES, T. & PERSHA, L. 2010. Nesting local forestry initiatives: Revisiting community forest management in a REDD plus world. Forest Policy and Economics, 12, 545-553.	2010	Journal article	PEER-REVIEWED	CS	AFRICA LAC	TANZANIA NICARAGUA	CFM	0	1	1	1	1	1	0	1	0	1	1	SM CM	2
57	HEGDE, R. & BULL, G. Q. 2011. Performance of an agro-forestry based Payments-for-Environmental-Services project in Mozambique: A household level analysis. Ecological Economics, 71, 122-130.	2011	Journal article	PEER-REVIEWED	CS	AFRICA	MOZAMBIQUE	VCM	1	0			1	1								1	1	1	0	-1	NCFM	1
58	HODGDON, B. D., HAYWARD, J. & SAMAYOA, O. 2013. Putting the plus first: community forest enterprise as the platform for REDD+ in the Maya Biosphere Reserve, Guatemala. Tropical Conservation Science, 6, 365-383.	2013	Journal article	NA	CS	LAC	GUATEMALA	CF	1	0	0	1	0	1								1	1	1	0	0	NONE	3
59	HOLLAND, M. B., DE KONING, F., MORALES, M., NAUGHTON-TREVES, L., ROBINSON, B. E. & SUÁREZ, L. 2014. Complex Tenure and Deforestation: Implications for Conservation Incentives in the Ecuadorian Amazon. World Development, 55, 21-36.	2014	Journal article	PEER-REVIEWED	CS	LAC	ECUADOR	IR	0	1	1	0	1	1	-1					BA PA SM	1
60	HUGHELL, D. & BUTTERFIELD, R. 2008. Impact of FSC Certification on Deforestation and the Incidence of Wildfires in the Maya Biosphere Reserve. Rainforest Alliance.	2008	Report/Working Paper	NA	CS	LAC	GUATEMALA	CF	0	1	0	1	0	1	1	1	1	1	1	BA	3
61	HUMPHRIES, S., HOLMES, T. P., KAINER, K., KOURY, C. G. G. A., CRUZ, E. & DE MIRANDA ROCHA, R. 2012. Are community-based forest enterprises in the tropics financially viable? Case studies from the Brazilian Amazon. Ecological Economics, 77, 62-73.	2012	Journal article	PEER-REVIEWED	CS	LAC	BRAZIL	CBFE	1	0	0	1	0	1								1	1				NONE	1
62	IRAWAN, S. & TACCONI, L. 2009. Reducing Emissions from Deforestation and Forest Degradation (REDD) and decentralized forest management. International Forestry Review, 11, 427-438.	2009	Journal article	PEER-REVIEWED	TP	GLOBAL
63	JINDAL, R., KERR, J. M. & CARTER, S. 2012. Reducing poverty through carbon forestry? Impacts of the N’hambita community carbon project in Mozambique. World Development, 40, 2123-2135.	2012	Journal article	PEER-REVIEWED	CS	AFRICA	MOZAMBIQUE	CS & REDD	1	1			1	0								0	1	1		1	BA NCFM	1
64	JOHANSSON, K. E., NANTONGO, C., GONDO, P., ROOS, A. & KLEINSCHMIT, D. 2013. Community based forest groups in Eastern and Southern Africa - a study of prospects for capacity improvement. International Forestry Review, 15, 471-488.	2013	Journal article	PEER-REVIEWED	CS	AFRICA	MULTIPLE	CBFG	1	0	1	1	1	1								0	0	1	1	-1	NONE	QR
65	JUMBE, C. B. L. & ANGELSEN, A. 2006. Do the Poor Benefit from Devolution Policies? Evidence from Malawi’s Forest Co-Management Program. Land Economics, 82, 562–581.	2006	Journal article	PEER-REVIEWED	CS	AFRICA	MALAWI	CM	1	0	0	1	1	0								0		1		-1	NCFM	1
66	KANNINEN, M., MURDIYARSO, D., SEYMOUR, F., ANGELSEN, A., WUNDER, S. & GERMAN, L. 2007. Do trees grow on money? The implications of deforestation research for policies to promote REDD. Bogor, Indonesia: Center for International Forestry Research (CIFOR).	2007	Book	NA	TP	GLOBAL
67	KARKY, B. S. & SKUTSCH, M. 2010. The cost of carbon abatement through community forest management in Nepal Himalaya. Ecological Economics, 69, 666-672.	2010	Journal article	PEER-REVIEWED	CS	ASIA	NEPAL	REDD	1	1	0	1	1	0	0	0	1	1	0	BA	1
68	KLOOSTER, D. & MASERA, O. 2000. Community forest management in Mexico: carbon mitigation and biodiversity conservation through rural development. Global Environmental Change-Human and Policy Dimensions, 10, 259-272.	2000	Journal article	PEER-REVIEWED	TP	LAC	MEXICO
69	LARSON, A., AND F. SOTO 2008. Decentralization of natural resource governance regimes. Annual Review of Environment and Resources, 33, 213-239.	2008	Journal article	PEER-REVIEWED	R	GLOBAL
70	LARSON, A. M., BARRY, D. & DAHAL, G. R. 2010. New rights for forest-based communities? Understanding processes of forest tenure reform. International Forestry Review, 12, 78-96.	2003	Journal article	PEER-REVIEWED	CS	GLOBAL	MULTIPLE	CFM (diverse)	1	1	1	1	1	1	0	-1	1	1	1	BA/NONE	3	1		1			NONE	3
71	LARSON, A. M. 2011. Forest tenure reform in the age of climate change: Lessons for REDD+. Global Environmental Change, 21, 540-549.	2011	Journal article	PEER-REVIEWED	TP	GLOBAL	MULTIPLE	CFM (diverse)	1	0														-1	-1	-1	NONE	QR
72	LASCO, R. D., EVANGELISTA, R. S. & PULHIN, F. B. 2010. Potential of Community-Based Forest Management to Mitigate Climate Change in the Philippines. Small-Scale Forestry, 9, 429-443.	2010	Journal article	PEER-REVIEWED	CS	ASIA	PHILIPPINES	CS	0	1	0	1	1	0			1			BA	2
73	LAWLOR, K., MADEIRA, E. M., BLOCKHUS, J. & GANZ, D. J. 2013. Community Participation and Benefits in REDD+: A Review of Initial Outcomes and Lessons. Forests, 4, 296-318.	2013	Journal article	PEER-REVIEWED	TP
74	LAWLOR, K., WEINTHAL, E. & LANDER, L. 2010. Institutions and Policies to Protect Rural Livelihoods in REDD plus Regimes. Global Environmental Politics, 10, 1-12.	2010	Journal article	PEER-REVIEWED	TP
75	LONG, A. 2012. REDD+ and Indigenous Peoples in Brazil. In: ABATE & KRONK (eds.) Climate Change, Indigenous Peoples and the Search for Legal Remedies. Edward Elgar Publishing.	2012	Book Chapter	PEER-REVIEWED	TP
76	LUND, J. F. & TREUE, T. 2008. Are We Getting There? Evidence of Decentralized Forest Management from the Tanzanian Miombo Woodlands. World Development, 36, 2780-2800.	2012	Journal article	PEER-REVIEWED	CS	AFRICA	TANZANIA		1	1	0	1	1	1	0	1	1	1	1	OT	2	1	1	1	1	-1	NONE	2
77	MAHANTY, S., GUERNIER, J. & YASMI, Y. 2009. A fair share? Sharing the benefits and costs of collaborative forest management. International Forestry Review, 11, 268-280.	2009	Journal article	PEER-REVIEWED	R	ASIA	MULTIPLE	CFM	1	0	0	1	1	1
78	MAHARJAN, M. R., RAM DAKAL, T., SURESHTHAPA, K., SCHRECKENBERG, K. & LUTTRELL, C. 2009. Improving the benefits to the poor from community forestry in the Churia region of Nepal. International Forestry Review, 11, 254-267.	2009	Journal article	PEER-REVIEWED	CS	ASIA	NEPAL	CF	1	0	0	1	1	0								1		1	1	1	BG BA	1
79	MALLA, Y. B. 2000. Impact of community forestry policy on rural livelihoods and food security in Nepal. Unasylva 51, 37-45.	2000	Journal article	PEER-REVIEWED	CS	ASIA	NEPAL	CFM	1	0	0	1	1	0								1	0	1		-1	BA	2
80	MALLA, Y. B., NEUPANE, H. R. & BRANNEY, P. J. 2003. Why aren’t poor people benefiting more from community forestry? Journal of Forest and Livelihood 3, 78-92.	2003	Journal article	PEER-REVIEWED	CS	ASIA	NEPAL	CFM	1	0	0	1	1	0										1		-1	BA	1
81	MARASENI, T. N., NEUPANE, P. R., LOPEZ-CASEROC, F. & CADMAN, T. 2014. An assessment of the impacts of the REDD pilot project on community forests user groups (CFUGs) and their community forests in Nepal. Journal of Environmental Management, 136, 37-46.	2014	Journal article	PEER-REVIEWED	CS	ASIA	NEPAL	REDD	1	0	0	1	1	0								0	0	-1	0	1	PI	3
82	MARYUDI, A., DEVKOTA, R. R., SCHUSSER, C., YUFANYI, C., SALLA, M., AURENHAMMER, H., ROTCHANAPHATHARAWIT, R. & KROTT, M. 2012. Back to basics: Considerations in evaluating the outcomes of community forestry. Forest Policy and Economics, 14, 1-5.	2012	Journal article	PEER-REVIEWED	TP
83	MAYERS, J. & BASS, S. (eds.) 1999. Policy that works for forests and people, London, UK: International Institute for Environment and Development.	1999	Report/Working Paper	NA	TP	GLOBAL
84	MCDERMOTT, M. H. & SCHRECKENBERG, K. 2009. Equity in community forestry: insights from North and South. International Forestry Review, 11, 157-170.	2009	Journal article	PEER-REVIEWED	TP	GLOBAL
85	MCDERMOTT, M., MAHANTY, S. & SCHRECKENBERG, K. 2013. Examining equity: A multidimensional framework for assessing equity in payments for ecosystem services. Environmental Science & Policy, 33, 416-427.	2013	Journal article	PEER-REVIEWED	TP	GLOBAL
86	MERGER, E., DUTSCHKE, M. & VERCHOT, L. 2011. Options for REDD+ Voluntary Certification to Ensure Net GHG Benefits, Poverty Alleviation, Sustainable Management of Forests and Biodiversity Conservation Forests, 2, 550-577.	2011	Journal article	PEER-REVIEWED	TP
87	MILNE, S. & ADAMS, W. M. 2012. Market Masquerades: Uncovering the Politics of Community-level Payments for Environmental Services in Cambodia. Development and Change, 43, 133-158.	2012	Journal article	PEER-REVIEWED	CS	ASIA	CAMBODIA	REDD	1	0	0	1	1	0								0	0	-1	-1	-1	PI	3
88	MINANG, P. A., BRESSERS, H. T. A., SKUTSCH, M. M. & MCCALL, M. K. 2007. National forest policy as a platform for biosphere carbon management: the case of community forestry in Cameroon. Environmental Science & Policy, 10, 204-218.	2007	Journal article	PEER-REVIEWED	TP	AFRICA	CAMEROON	CDM
89	MOHAMMED, E. Y. 2011. Pro-poor benefit distribution in REDD+: who gets what and why does it matter? REDD Working Paper. London, UK: International Institute for Environment and Development (IIED).	2011	Report/Working Paper	NA	TP
90	MOLNAR, A., LIDDLE, M., BRACER, C., KHARE, A., WHITE, A. & BULL, J. 2007. Community-based forest enterprises in tropical forest countries: status and potential. ITTO, RRI and Forest Trends.	2007	Report/Working Paper	NA	R	GLOBAL
91	MOLNAR, A., SCHERR, S. J. & KHARE, A. 2004. Who conserves the world's forests? A new assessment of conservation and investment trends. Washington, DC: Forest Trends.	2004	Report/Working Paper	NA	TP	GLOBAL
92	MUKAMA, K., MUSTALAHTI, I. & ZAHABU, E. 2012. Participatory Forest Carbon Assessment and REDD+: Learning from Tanzania. International Journal of Forestry Research, 2012, 126454, 14 pages.	2012	Journal article	PEER-REVIEWED	CS	AFRICA	TANZANIA	PFM	0	1	1	0	1	0	0	0	0	1	1	NONE	3
93	MURALI, K. S., MURTHY, I. K. & RAVINDRANATH, N. H. 2002. Joint Forest Management in India and Its Ecological Impacts. Environmental Management and Health, 13, 512-528.	2002	Journal article	PEER-REVIEWED	CS	ASIA	INDIA	JFM	0	1	0	1	1	0		1	1	1	1	SM	3
94	MURDIYARSO, D. & SKUTSCH, M. (eds.) 2006. Community forest management as a carbon mitigation option: Case studies, Bogor, Indonesia: Center for International Forestry Research (CIFOR).	2006	Edited Book	NA	CS	GLOBAL	MULTIPLE	CS	0	1	1	1	1	1	0	1	1	1	1	BA	2
95	MUSTALAHTI, I., BOLIN, A., BOYD, E. & PAAVOLA, J. 2012. Can REDD plus Reconcile Local Priorities and Needs with Global Mitigation Benefits? Lessons from Angai Forest, Tanzania. Ecology and Society, 17.	2012	Journal article	PEER-REVIEWED	TP	AFRICA	TANZANIA	REDD
96	MUSUMALI, M. M., LARSEN, T. S. & KALTENBORN, B. P. 2007. An impasse in community based natural resource management implementation: the case of Zambia and Botswana. Oryx, 41, 306-313.	2007	Journal article	PEER-REVIEWED	CS	AFRICA	BOTSWANA ZAMBIA	CBFG	1	0	0	1	1	0								0	0	1	0	0	NONE	3
97	NAGENDRA, H. 2007. Drivers of reforestation in human-dominated forests. Proceedings of the National Academy of Sciences of the United States of America, 104, 15218-15223.	2007	Journal article	PEER-REVIEWED	CS	ASIA	NEPAL	CF	0	1	0	1	1	0	0	1	1	1	1	SM	2
98	NELSON, A. & CHOMITZ, K. M. 2011. Effectiveness of Strict vs. Multiple Use Protected Areas in Reducing Tropical Forest Fires: A Global Analysis Using Matching Methods. Plos One, 6.	2011	Journal article	PEER-REVIEWED	CS	GLOBAL	GLOBAL	IR	0	1	1	1	1					1	1	PA NCFM	1
99	NEPSTAD, D., SCHWARTZMAN, S., BAMBERGER, B., SANTILLI, M., RAY, D., SCHLESINGER, P., LEFEBVRE, P., ALENCAR, A., PRINZ, E., FISKE, G. & ROLLA, A. 2006. Inhibition of Amazon deforestation and fire by parks and indigenous lands. Conservation Biology, 20, 65-73.	2006	Journal article	PEER-REVIEWED	CS	LAC	BRAZIL	IR	0	1	1	0	1	1	1	1	1	1	1	PA SM NM	1
100	NEUPANE, S. & SHRESTLA, K. K. 2012. Sustainable Forest Governance in a Changing Climate: Impacts of REDD Program on the Livelihoods of Poor Communities in Nepalese Community Forestry. OIDA International Journal of Sustainable Development, 4, 71-81.	2012	Journal article	PEER-REVIEWED	TP	ASIA	NEPAL	CFUG																-1	-1	-1	NONE	3
101	OSTROM, E. 1990. Governing the Commons: The Evolution of Institutions for Collective Action, Cambridge University Press.	1990	Book	NA	TP
102	PAGDEE, A., KIM, Y.-S. & DAUGHERTY, P. J. 2006. What makes community forest management successful: a meta-study from community forests throughout the world. Society & Natural Resources, 19, 33-52.	2006	Journal article	PEER-REVIEWED	R	GLOBAL
103	PANDIT, B. H. & THAPA, G. B. 2003. A tragedy of non-timber forest resources in the mountain commons of Nepal. Environmental Conservation, 30, 283-292.	2003	Journal article	PEER-REVIEWED	CS	ASIA	NEPAL	CFUG	0	1	0	1	1	1	0	1	0	0	1	SM	3
104	PERSHA, L., AGRAWAL, A. & CHHATRE, A. 2011. Social and Ecological Synergy: Local Rulemaking, Forest Livelihoods, and Biodiversity Conservation. Science, 331, 1606-1608.	2011	Journal article	PEER-REVIEWED	CS	AFRICA ASIA	MULTIPLE	CFM	1	1	1	1	1	1	0	0	0	1	1	SM VARIOUS	2			1			SM VARIOUS	2
105	PETTENELLA, D. & BROTTO, L. 2012. Governance features for successful REDD plus projects organization. Forest Policy and Economics, 18, 46-52.	2012	Journal article	PEER-REVIEWED	TP	GLOBAL	PERU	REDD
106	PFAFF, A., ROBALINO, J., LIMA, E., SANDOVAL, C. & HERRERA, L. D. 2014. Governance, Location and Avoided Deforestation from Protected Areas: Greater Restrictions Can Have Lower Impact, Due to Differences in Location. World Development, 55, 7-20.	2014	Journal article	PEER-REVIEWED	CS	LAC	BRAZIL	SU	0	1	0	1	1	1	1	1	1	1	1	PA NM IR	1
107	PHELPS, J., WEBB, E. L. & AGRAWAL, A. 2010. Does REDD plus Threaten to Recentralize Forest Governance? Science, 328, 312-313.	2010	Journal article	PEER-REVIEWED	TP	GLOBAL
108	POFFENBERGER, M. 2006. People in the forest: community forestry experiences from Southeast Asia. International Journal of Environment and Sustainable Development, 5, 57-69.	2006	Journal article	PEER-REVIEWED	TP	ASIA	MULTIPLE
109	POKHAREL, B. & NURSE, M. 2004. Forests and people’s livelihood: benefiting the poor from community forestry. Journal of Forest and Livelihood, 4, 19-29.	2004	Journal article	PEER-REVIEWED	CS	ASIA	NEPAL	CF	1	0	0	1	1	0										1	1	-1	NONE	QR
110	PORTER-BOLLAND, L., ELLIS, E. A., GUARIGUATA, M. R., RUIZ-MALLÉN, I., NEGRETE-YANKELEVICH, S. & REYES-GARCÍA, V. 2012. Community managed forests and forest protected areas: An assessment of their conservation effectiveness across the tropics. Forest Ecology and Management, 268, 6-17.	2012	Journal article	PEER-REVIEWED	R	GLOBAL	MULTIPLE	CFM	0	1					1	1	0	1	1	PA	2
111	PURNOMO, H., ARUM, G. S., ACHDIAWAN, R. & IRAWATI, R. H. 2012. Rights and Wellbeing: An Analytical Approach to Global Case Comparison of Community Forestry. Journal of Sustainable Development, 5, 35-48.	2012	Journal article	PEER-REVIEWED	R	GLOBAL	MULTIPLE	CF
112	PUTZ, F. E. & ROMERO, C. 2012. Helping curb tropical forest degradation by linking REDD+ with other conservation interventions: a view from the forest Current Opinion in Environmental Sustainability, 2012.	2012	Journal article	PEER-REVIEWED	TP	GLOBAL
113	RIBOT, J. C., AGRAWAL, A. & LARSON, A. M. 2006. Recentralizing while decentralizing: how national governments reappropriate forest resources. World Development, 34, 1864-1886.	2006	Journal article	PEER-REVIEWED	TP	GLOBAL	MULTIPLE
114	RIBOT, J. C., TREUE, T. & LUND, J. F. 2010. Democratic decentralization in sub-Saharan Africa: its contribution to forest management, livelihoods, and enfranchisement. Environmental Conservation, 37, 35-44.	2010	Journal article	PEER-REVIEWED	R	AFRICA	MULTIPLE	CBNRM
115	ROBINSON, B. E., HOLLAND, M. B. & NAUGHTON-TREVES, L. 2013. Does secure land tenure save forests? A meta-analysis of the relationship between land tenure and tropical deforestation. Global Environmental Change.	2013	Journal article	PEER-REVIEWED	R
116	ROBINSON, E. J. Z., ALBERS, H. J., MESHACK, C. & LOKINA, R. B. 2013. Implementing REDD through community-based forest management: lessons from Tanzania. Natural Resource Forum, 37, 141-152.	2013	Journal article	PEER-REVIEWED	TP
117	SCHRECKENBERG, K. & LUTTRELL, C. 2009. Participatory forest management: a route to poverty reduction? International Forestry Review, 11, 221-238.	2009	Journal article	PEER-REVIEWED	TP	GLOBAL	MULTIPLE	PFM	1	0	1	1	1	0								1	0	1			NONE	QR
118	SEYMOUR, F., LA VINA, T. & HITE, K. 2014. Evidence linking community level tenure and forest condition: An annotated bibliography. Climate and Land Use Alliance.	2014	Annotated Bibliography	NA	R	GLOBAL
119	SIKOR, T., STAHL, J., ENTERS, T., RIBOT, J. C., SINGH, N., SUNDERLIN, W. D. & WOLLENBERG, L. 2010. REDD-Plus, Forest People's Rights and Nested Climate Governance. Global Environmental Change, 20, 423-425.	2010	Journal article	PEER-REVIEWED	TP	GLOBAL
120	SINGH, P. P. 2008. Exploring biodiversity and climate change benefits of community-based forest management. Global Environmental Change-Human and Policy Dimensions, 18, 468-478.	2008	Journal article	PEER-REVIEWED	CS	ASIA	INDIA	CBFM	0	1	0	1	1	0	0	1	1	1	1	NONE	2
121	SKUTSCH, M. & MCCALL, M. K. 2012. The role of community forest management in REDD+. FAO working paper. http://redd.ciga.unam.mx/files/FAOSkutschMcCall_workingPaper.pdf.	2012	Report/Working Paper	NA	TP
122	SKUTSCH, M. & SOLIS, S. 2010. How much carbon does community forest management save? The results of K:TGAL´s field measurements [Online]. http://www.communitycarbonforestry.org/NewPublications/How%20much%20carbon%20does%20community%20forest%20management%20save%20website%20version.pdf: K:TGAL project.	2010	Web report	PEER-REVIEWED	CS	GLOBAL	MULTIPLE	CFM	0	1	1	1	1	1	0	1	1	1	1	BA	1
123	SKUTSCH, M., VICKERS, B., GEORGIADOU, Y. & MCCALL, M. 2011. Alternative models for carbon payments to communities under REDD+: A comparison using the Polis model of actor inducements. Environmental Science & Policy, 14, 140-151.	2011	Journal article	PEER-REVIEWED	TP
124	SKUTSCH, M. M. 2005. Reducing carbon transaction costs in community-based forest management. Climate Policy, 5, 433-443.	2005	Journal article	PEER-REVIEWED	TP
125	SKUTSCH, M. M. & BA, L. 2010. Crediting carbon in dry forests: The potential for community forest management in West Africa. Forest Policy and Economics, 12, 264-270.	2010	Journal article	PEER-REVIEWED	CS	AFRICA	MULTIPLE	CFM	0	1	0	1	1	0	0	1	1	1	1	BA	1
126	SOMANATHANA, E., PRABHAKAR, R. & BHUPENDRA SINGH, M. 2009. Decentralization for cost-effective conservation. Proceedings of the National Academy of Sciences, 106, 4143-4147.	2009	Journal article	PEER-REVIEWED	CS	ASIA	INDIA	VCFM	0	1	0	1	1	0	0	0	0	1	1	SM	1
127	SPRINGATE-BAGINSKI, O. & WOLLENBERG, E. (eds.) 2010. REDD, forest governance and rural livelihoods: the emerging agenda, Bogor, Indonesia: CIFOR.	2010	Edited Book	NA	TP
128	STEVENS, C., WINTERBOTTOM, R., SPRINGER, J. & REYTAR, K. 2014. Securing Rights, Combating Climate Change: How Strengthening Community Forest Rights Mitigates Climate Change. Washington, DC: World Resources Institute.	2014	Report/Working Paper	NA	TP
129	STOCKS, A., MCMAHAN, B. & TABER, P. 2007. Indigenous, colonist, and government Impacts on Nicaragua's Bosawas Reserve. Conservation Biology, 21, 1495-1505.	2007	Journal article	PEER-REVIEWED	CS	LAC	NICARAGUA	IR	0	1	0	0	1	0	1	0	0	1	1	NCFM/PL	1
130	SUNDERLIN, W., DEWI, S. & PUNTODEWO, A. 2007. Poverty and forests: Multi-country analysis of spatial association and proposed policy solutions. . Bogor, Indonesia: Centre for International Forestry Research.	2007	Report/Working Paper	NA	TP	GLOBAL
131	SUNDERLIN, W., HATCHER, J. & LIDDLE, M. 2008. From Exclusion to Ownership? Challenges and Opportunities in Advancing Forest Tenure Reforms. Washington, DC.: Rights and Resources Initiative.	2008	Report/Working Paper	NA	TP	GLOBAL
132	SUNDERLIN, W. D., DEWI, S., PUNTODEWO, A., MÜLLER, D., ANGELSEN, A. & EPPRECHT, M. 2008. Why forests are important for global poverty alleviation: a spatial explanation. Ecology and Society, 13, 24.	2008	Journal article	PEER-REVIEWED	TP	GLOBAL
133	TACCONI, L. 2007. Decentralization, forests and livelihoods: theory and narrative. Global Environmental Change, 17, 338-348.	2007	Journal article	PEER-REVIEWED	TP	GLOBAL
134	THOMAS, S., DARGUSCH, P., HARRISON, S. & HERBOHN, J. 2010. Why are there so few afforestation and reforestation Clean Development Mechanism projects? . Land Use Policy, 27, 880–887.	2010	Journal article	PEER-REVIEWED	TP	GLOBAL		CDM
135	TOMASELLI, M. F. & HAJJAR, R. 2011. Promoting Community Forestry Enterprises in National REDD+ Strategies: A business approach. Forests, 2, 283-300.	2011	Journal article	PEER-REVIEWED	TP			CFE
136	TORRES-ROJO, J. M., GUEVARA-SANGINÉS, A. & BRAY, D. B. 2005. The managerial economics of sustainable community forestry in Mexico: a case study of El Balcón, Técpan, Guerrero. In: BRAY, D. B., MERINO-PÉREZ, L. & BARRY, D. (eds.) The Community Forests of Mexico: Managing for Sustainable Landscapes. Austin, Texas: University of Texas Press.	2005	Book Chapter	NA	TP
137	VERGARA-ASENJO, G. & POTVIN, C. 2014. Forest protection and tenure status: The key role of indigenous peoples and protected areas in Panama. Global Environmental Change, 28, 205-215.	2014	Journal article	PEER-REVIEWED	CS	LAC	PANAMA	IR	0	1	1	1	1	1	0	1	1	1	1	PA SM NM	1
138	VYAMANA, V. G. 2009. Participatory forest management in the Eastern Arc Mountains of Tanzania: who benefits? International Forestry Review, 11, 239-253.	2009	Journal article	PEER-REVIEWED	CS	AFRICA	TANZANIA	CBFM/JFM	1	0	1	1	1	1								1	0	1	1	-1	BA NCFM	1
139	WALKER, W., BACCINI, A., SCHWARTZMAN, S., RÍOS, S., OLIVEIRA-MIRANDA, M., AUGUSTO, C., ROMERO RUIZ, M., ARRASCO, C. S., RICARDO, B., SMITH, R., MEYER, C., JINTIACH, J. C. & CAMPOS, E. V. 2014. Forest Carbon in Amazonia: The Unrecognized Contribution of Indigenous Territories and Protected Natural Areas. Carbon Management.	2014	Journal article	PEER-REVIEWED	CS	LAC	MULTIPLE	IR	0	1	1	1	1	1	0	0	1	1	1	OL PA	1
140	WHITE, A. & MARTIN, A. 2002. Who owns the world's forests? Forest tenure and public forests in transition. Washington, D.C.: Forest Trends and Center for International Environmental Law.	2002	Report/Working Paper	NA	TP	GLOBAL
141	WOLLENBERG, E., COLCHESTER, M., MBUGUA, G. & GRIFFITHS, T. 2006. Linking social movements: how international networks can better support community action about forests. International Forestry Review, 8, 265-272.	2006	Journal article	PEER-REVIEWED	TP	GLOBAL
142	WUNDER, S. 2001. Poverty alleviation and tropical forests-what scope for synergies? World Development, 29, 1817-1833.	2001	Journal article	PEER-REVIEWED	TP	GLOBAL
143	WUNDER, S., ANGELSEN, A. & BELCHER, B. 2014. Forests, Livelihoods, and Conservation: Broadening the Empirical Base. World Development.	2014	Journal article	PEER-REVIEWED	TP	GLOBAL
144	WUNDER, S., BÖRNER, J., SHIVELY, G. & WYMAN, M. 2014. Safety Nets, Gap Filling and Forests: A Global-Comparative Perspective. World Development.	2014	Journal article	PEER-REVIEWED	TP	GLOBAL
145	YAMANOSHITA, M. Y. & AMANO, M. 2012. Capability development of local communities for project sustainability in afforestation/reforestation clean development mechanism. Mitigation and Adaptation Strategies for Global Change, 17, 425-440.	2012	Journal article	PEER-REVIEWED	CS	ASIA	VIETNAM	CDM	1	0	1	0	1	0								1	1	-1	1	-1	BA	2
